# Supplementary material for: Marine algal flora of Santa Maria Island, Azores
Source: Biodivers Data J. 2021 Mar 25;9:e61909. doi: 10.3897/BDJ.9.e61909 (PMC8016821; doi:10.3897/BDJ.9.e61909)
Supplement: Supplementary material 1 — DP-SMA-id_15162_normalized.csv [file bdj-09-e61909-s001.csv]

occurrenceId	verbatimScientificName	scientificName	key	matchType	confidence	status	rank	kingdom	phylum	class	order	family	genus	species
,"Acrosorium ciliolatum (Harvey) Kylin","Acrosorium ciliolatum (Harv.) Kylin","2662395","EXACT","100","ACCEPTED","SPECIES","Plantae","Rhodophyta","Florideophyceae","Ceramiales","Delesseriaceae","Acrosorium","Acrosorium ciliolatum"
,"Acrothamnion preissii (Sonder) E.M.Wollaston","Acrothamnion preissii (Sonder) E.M.Wollaston, 1968","2658484","EXACT","100","ACCEPTED","SPECIES","Plantae","Rhodophyta","Florideophyceae","Ceramiales","Ceramiaceae","Acrothamnion","Acrothamnion preissii"
,"Aglaothamnion pseudobyssoides (Crouan & Crouan) Halos","Aglaothamnion pseudobyssoides (P.Crouan & H.Crouan) L'Hardy-Halos","2656956","EXACT","100","ACCEPTED","SPECIES","Plantae","Rhodophyta","Florideophyceae","Ceramiales","Callithamniaceae","Aglaothamnion","Aglaothamnion pseudobyssoides"
,"Amphiroa fragilissima (Linnaeus) J.V.Lamouroux","Amphiroa fragilissima (L.) J.V.Lamour.","5276535","EXACT","100","ACCEPTED","SPECIES","Plantae","Rhodophyta","Florideophyceae","Corallinales","Corallinaceae","Amphiroa","Amphiroa fragilissima"
,"Anotrichium furcellatum (J.Agardh) Baldock","Anotrichium furcellatum (J.Agardh) Baldock","2656854","EXACT","100","ACCEPTED","SPECIES","Plantae","Rhodophyta","Florideophyceae","Ceramiales","Wrangeliaceae","Anotrichium","Anotrichium furcellatum"
,"Antithamnion hubbsii E.Y.Dawson","Antithamnion hubbsii E.Y.Dawson, 1962","2657472","EXACT","100","ACCEPTED","SPECIES","Plantae","Rhodophyta","Florideophyceae","Ceramiales","Ceramiaceae","Antithamnion","Antithamnion hubbsii"
,"Asparagopsis armata Harvey","Asparagopsis armata Harv.","5279840","EXACT","100","ACCEPTED","SPECIES","Plantae","Rhodophyta","Florideophyceae","Bonnemaisoniales","Bonnemaisoniaceae","Asparagopsis","Asparagopsis armata"
,"Asparagopsis armata Harvey phase Falkenbergia rufolanosa (Harvey) F.Schmitz","Asparagopsis armata Harv.","5279840","HIGHERRANK","100","ACCEPTED","SPECIES","Plantae","Rhodophyta","Florideophyceae","Bonnemaisoniales","Bonnemaisoniaceae","Asparagopsis","Asparagopsis armata"
,"Asparagopsis taxiformis (Delile) Trevisan","Asparagopsis taxiformis (Delile) Trevis.","5279834","EXACT","100","ACCEPTED","SPECIES","Plantae","Rhodophyta","Florideophyceae","Bonnemaisoniales","Bonnemaisoniaceae","Asparagopsis","Asparagopsis taxiformis"
,"Bachelotia antillarum (Grunow) Gerloff","Bachelotia antillarum (Grunow) Gerloff","3199421","EXACT","100","ACCEPTED","SPECIES","Chromista","Ochrophyta","Phaeophyceae","Scytothamnales","Bachelotiaceae","Bachelotia","Bachelotia antillarum"
,"Bonnemaisonia hamifera Hariot","Bonnemaisonia hamifera Hariot","2668884","EXACT","100","ACCEPTED","SPECIES","Plantae","Rhodophyta","Florideophyceae","Bonnemaisoniales","Bonnemaisoniaceae","Bonnemaisonia","Bonnemaisonia hamifera"
,"Bornetia secundiflora (J.Agardh) Thuret","Bornetia secundiflora (J.Agardh) Thur., 1855","2658705","EXACT","100","ACCEPTED","SPECIES","Plantae","Rhodophyta","Florideophyceae","Ceramiales","Ceramiaceae","Bornetia","Bornetia secundiflora"
,"Bryopsis hypnoides J.V.Lamouroux","Bryopsis hypnoides J.V.Lamour.","5272051","EXACT","100","ACCEPTED","SPECIES","Plantae","Chlorophyta","Ulvophyceae","Bryopsidales","Bryopsidaceae","Bryopsis","Bryopsis hypnoides"
,"Bryopsis plumosa (Hudson) C.Agardh","Bryopsis plumosa (Hudson) C.Agardh","5272029","EXACT","100","ACCEPTED","SPECIES","Plantae","Chlorophyta","Ulvophyceae","Bryopsidales","Bryopsidaceae","Bryopsis","Bryopsis plumosa"
,"Callithamnion corymbosum (J.E.Smith) Lyngbye","Callithamnion corymbosum (J.E.Smith) Lyngbye","2658582","EXACT","100","ACCEPTED","SPECIES","Plantae","Rhodophyta","Florideophyceae","Ceramiales","Callithamniaceae","Callithamnion","Callithamnion corymbosum"
,"Callithamnion granulatum (Ducluzeau) C.Agardh","Callithamnion granulatum (Ducluz.) C.Agardh","2658548","EXACT","100","ACCEPTED","SPECIES","Plantae","Rhodophyta","Florideophyceae","Ceramiales","Callithamniaceae","Callithamnion","Callithamnion granulatum"
,"Canistrocarpus cervicornis (Kützing) J.C.de Paula & De Clerck","Canistrocarpus cervicornis (Kütz.) J.C.De Paula & De Clerck","4377177","EXACT","100","ACCEPTED","SPECIES","Chromista","Ochrophyta","Phaeophyceae","Dictyotales","Dictyotaceae","Canistrocarpus","Canistrocarpus cervicornis"
,"Carpomitra costata(Stackhouse) Batters","Carpomitra costata (Stackh.) Batters","3196229","EXACT","100","ACCEPTED","SPECIES","Chromista","Ochrophyta","Phaeophyceae","Sporochnales","Sporochnaceae","Carpomitra","Carpomitra costata"
,"Carradoriella denudata (Dillwyn) A.M.Savoie & G.W.Saunders","Carradoriella P.C.Silva, 1996","2659269","HIGHERRANK","96","SYNONYM","GENUS","Plantae","Rhodophyta","Florideophyceae","Ceramiales","Rhodomelaceae","Polysiphonia",
,"Carradoriella elongata (Hudson) A.M.Savoie & G.W.Saunders","Carradoriella P.C.Silva, 1996","2659269","HIGHERRANK","96","SYNONYM","GENUS","Plantae","Rhodophyta","Florideophyceae","Ceramiales","Rhodomelaceae","Polysiphonia",
,"Catenella caespitosa (Withering) L.M.Irvine","Catenella caespitosa (With.) L.M.Irvine","5279220","EXACT","100","ACCEPTED","SPECIES","Plantae","Rhodophyta","Florideophyceae","Gigartinales","Caulacanthaceae","Catenella","Catenella caespitosa"
,"Caulacanthus ustulatus (Turner) Kützing","Caulacanthus ustulatus (Mertens ex Turner) Kütz., 1843","2666536","EXACT","100","ACCEPTED","SPECIES","Plantae","Rhodophyta","Florideophyceae","Gigartinales","Caulacanthaceae","Caulacanthus","Caulacanthus ustulatus"
,"Centroceras clavulatum (C.Agardh) Montagne","Centroceras clavulatum (C.Agardh) Mont.","5276780","EXACT","100","ACCEPTED","SPECIES","Plantae","Rhodophyta","Florideophyceae","Ceramiales","Ceramiaceae","Centroceras","Centroceras clavulatum"
,"Ceramium codii (H.Richards) Mazoyer","Ceramium codii (H.Richards) Mazoyer","5276922","EXACT","100","ACCEPTED","SPECIES","Plantae","Rhodophyta","Florideophyceae","Ceramiales","Ceramiaceae","Ceramium","Ceramium codii"
,"Ceramium diaphanum (Lightfoot) Roth","Ceramium diaphanum (Lightfoot) Roth","5277142","EXACT","100","ACCEPTED","SPECIES","Plantae","Rhodophyta","Florideophyceae","Ceramiales","Ceramiaceae","Ceramium","Ceramium diaphanum"
,"Ceramium strictum Roth","Ceramium strictum Roth, 1806","7641070","EXACT","100","SYNONYM","SPECIES","Plantae","Rhodophyta","Florideophyceae","Ceramiales","Rhodomelaceae","Polysiphonia","Polysiphonia stricta"
,"Ceramium virgatum Roth","Ceramium virgatum Roth","5277079","EXACT","100","ACCEPTED","SPECIES","Plantae","Rhodophyta","Florideophyceae","Ceramiales","Ceramiaceae","Ceramium","Ceramium virgatum"
,"Chaetomorpha aerea (Dillwyn) Kützing","Chaetomorpha aerea (Dillwyn) Kützing","2644557","EXACT","100","SYNONYM","SPECIES","Plantae","Chlorophyta","Ulvophyceae","Cladophorales","Cladophoraceae","Chaetomorpha","Chaetomorpha linum"
,"Chaetomorpha linum (O.F.Müller) Kützing","Chaetomorpha linum (O.F.Müller) Kützing","2644592","EXACT","100","ACCEPTED","SPECIES","Plantae","Chlorophyta","Ulvophyceae","Cladophorales","Cladophoraceae","Chaetomorpha","Chaetomorpha linum"
,"Chaetomorpha pachynema (Montagne) Kützing","Chaetomorpha pachynema (Mont.) Kütz.","2644584","EXACT","100","ACCEPTED","SPECIES","Plantae","Chlorophyta","Ulvophyceae","Cladophorales","Cladophoraceae","Chaetomorpha","Chaetomorpha pachynema"
,"Chondracanthus acicularis (Roth) Fredericq","Chondracanthus acicularis (Roth) Fredericq","5279140","EXACT","100","ACCEPTED","SPECIES","Plantae","Rhodophyta","Florideophyceae","Gigartinales","Gigartinaceae","Chondracanthus","Chondracanthus acicularis"
,"Chondracanthus teedei (Mertens ex Roth) Fredericq","Chondracanthus teedei (Mertens ex Roth) Fredericq","8037811","EXACT","100","ACCEPTED","SPECIES","Plantae","Rhodophyta","Florideophyceae","Gigartinales","Gigartinaceae","Chondracanthus","Chondracanthus teedei"
,"Chondria capillaris (Hudson) M.J.Wynne","Chondria capillaris (Huds.) M.J.Wynne","5279778","EXACT","100","ACCEPTED","SPECIES","Plantae","Rhodophyta","Florideophyceae","Ceramiales","Rhodomelaceae","Chondria","Chondria capillaris"
,"Chondria dasyphylla (Woodward) C.Agardh","Chondria dasyphylla (Woodward) C.Agardh","7769508","EXACT","100","ACCEPTED","SPECIES","Plantae","Rhodophyta","Florideophyceae","Ceramiales","Rhodomelaceae","Chondria","Chondria dasyphylla"
,"Cladophora albida (Nees) Kützing","Cladophora albida (Nees) Kützing","5272397","EXACT","100","ACCEPTED","SPECIES","Plantae","Chlorophyta","Ulvophyceae","Cladophorales","Cladophoraceae","Cladophora","Cladophora albida"
,"Cladophora coelothrix Kützing","Cladophora coelothrix Kütz.","5272740","EXACT","100","ACCEPTED","SPECIES","Plantae","Chlorophyta","Ulvophyceae","Cladophorales","Cladophoraceae","Cladophora","Cladophora coelothrix"
,"Cladophora laetevirens (Dillwyn) Kützing","Cladophora laetevirens (Dillwyn) Kützing","5272485","EXACT","100","ACCEPTED","SPECIES","Plantae","Chlorophyta","Ulvophyceae","Cladophorales","Cladophoraceae","Cladophora","Cladophora laetevirens"
,"Cladophora lehmanniana (Lindenberg) Kützing","Cladophora lehmanniana (Lindenb.) Kütz.","5272598","EXACT","100","ACCEPTED","SPECIES","Plantae","Chlorophyta","Ulvophyceae","Cladophorales","Cladophoraceae","Cladophora","Cladophora lehmanniana"
,"Cladophora liebetruthii Grunow","Cladophora liebetruthii Grunow, 1884","5272569","EXACT","100","ACCEPTED","SPECIES","Plantae","Chlorophyta","Ulvophyceae","Cladophorales","Cladophoraceae","Cladophora","Cladophora liebetruthii"
,"Cladophora prolifera (Roth) Kützing","Cladophora prolifera (Roth) Kütz.","5272619","EXACT","100","ACCEPTED","SPECIES","Plantae","Chlorophyta","Ulvophyceae","Cladophorales","Cladophoraceae","Cladophora","Cladophora prolifera"
,"Cladostephus spongiosus (Hudson) C.Agardh","Cladostephus spongiosus (Huds.) C.Agardh","3200756","EXACT","100","ACCEPTED","SPECIES","Chromista","Ochrophyta","Phaeophyceae","Sphacelariales","Cladostephaceae","Cladostephus","Cladostephus spongiosus"
,"Codium adhaerens C.Agardh","Codium adhaerens C.Agardh, 1822","5272156","EXACT","100","ACCEPTED","SPECIES","Plantae","Chlorophyta","Ulvophyceae","Bryopsidales","Codiaceae","Codium","Codium adhaerens"
,"Codium effusum (Rafinesque) Delle Chiaje","Codium effusum (Rafinesque) Delle Chiaje, 1829","5272175","EXACT","100","ACCEPTED","SPECIES","Plantae","Chlorophyta","Ulvophyceae","Bryopsidales","Codiaceae","Codium","Codium effusum"
,"Codium fragile subsp. atlanticum (Cotton) P.C.Silva","Codium fragile subsp. atlanticum (Cotton) P.C.Silva","5272106","EXACT","100","ACCEPTED","SUBSPECIES","Plantae","Chlorophyta","Ulvophyceae","Bryopsidales","Codiaceae","Codium","Codium fragile"
,"Codium fragile subsp. fragile (Suringar) Hariot","Codium fragile subsp. fragile","7230558","EXACT","100","ACCEPTED","SUBSPECIES","Plantae","Chlorophyta","Ulvophyceae","Bryopsidales","Codiaceae","Codium","Codium fragile"
,"Codium taylorii P.C.Silva","Codium taylorii P.C.Silva","5272185","EXACT","100","ACCEPTED","SPECIES","Plantae","Chlorophyta","Ulvophyceae","Bryopsidales","Codiaceae","Codium","Codium taylorii"
,"Codium tomentosum Stackhouse","Codium tomentosum Stackh.","5272167","EXACT","100","ACCEPTED","SPECIES","Plantae","Chlorophyta","Ulvophyceae","Bryopsidales","Codiaceae","Codium","Codium tomentosum"
,"Colpomenia sinuosa (Mertens ex Roth) Derbès & Solier","Colpomenia sinuosa (Mert. ex Roth) Derbès & Solier","3197958","EXACT","100","ACCEPTED","SPECIES","Chromista","Ochrophyta","Phaeophyceae","Scytosiphonales","Scytosiphonaceae","Colpomenia","Colpomenia sinuosa"
,"Corallina ferreyrae E.Y.Dawson","Corallina ferreyrai E.Y.Dawson et al.","5730171","FUZZY","95","ACCEPTED","SPECIES","Plantae","Rhodophyta","Florideophyceae","Corallinales","Corallinaceae","Corallina","Corallina ferreyrai"
,"Corallina officinalis Linnaeus","Corallina officinalis Linnaeus, 1758","5276013","EXACT","100","ACCEPTED","SPECIES","Plantae","Rhodophyta","Florideophyceae","Corallinales","Corallinaceae","Corallina","Corallina officinalis"
,"Cottoniella filamentosa (M.Howe) Børgesen","Cottoniella filamentosa (M.Howe) Børgesen","2662549","EXACT","100","ACCEPTED","SPECIES","Plantae","Rhodophyta","Florideophyceae","Ceramiales","Sarcomeniaceae","Cottoniella","Cottoniella filamentosa"
,"Crouania attenuata (C.Agardh) J.Agardh","Crouania attenuata (C.Agardh) J.Agardh","5276756","EXACT","100","ACCEPTED","SPECIES","Plantae","Rhodophyta","Florideophyceae","Ceramiales","Callithamniaceae","Crouania","Crouania attenuata"
,"Cryptopleura ramosa (Hudson) L.Newton","Cryptopleura ramosa (Hudson) L.Newton","5278328","EXACT","100","ACCEPTED","SPECIES","Plantae","Rhodophyta","Florideophyceae","Ceramiales","Delesseriaceae","Cryptopleura","Cryptopleura ramosa"
,"Cutleria multifida (Turner) Greville","Cutleria multifida (Turner) Grev.","5422862","EXACT","100","ACCEPTED","SPECIES","Chromista","Ochrophyta","Phaeophyceae","Cutleriales","Cutleriaceae","Cutleria","Cutleria multifida"
,"Cutleria multifida (Turner) Greville phase Aglaozonia parvula (Greville) Zanardini","Cutleria multifida (Turner) Grev.","5422862","HIGHERRANK","100","ACCEPTED","SPECIES","Chromista","Ochrophyta","Phaeophyceae","Cutleriales","Cutleriaceae","Cutleria","Cutleria multifida"
,"Cystoseira compressa (Esper) Gerloff & Nizamuddin","Cystoseira compressa (Esper) Gerloff & Nizamuddin, 1975","8188962","EXACT","100","ACCEPTED","SPECIES","Chromista","Ochrophyta","Phaeophyceae","Fucales","Sargassaceae","Cystoseira","Cystoseira compressa"
,"Cystoseira foeniculacea (Linnaeus) Greville","Cystoseira foeniculacea (L.) Grev.","3197777","EXACT","100","ACCEPTED","SPECIES","Chromista","Ochrophyta","Phaeophyceae","Fucales","Sargassaceae","Cystoseira","Cystoseira foeniculacea"
,"Cystoseira humilis Schousboe ex Kützing","Cystoseira humilis Schousboe ex Kütz., 1860","3197719","EXACT","100","ACCEPTED","SPECIES","Chromista","Ochrophyta","Phaeophyceae","Fucales","Sargassaceae","Cystoseira","Cystoseira humilis"
,"Cystoseira tamariscifolia (Hudson) Papenfuss","Cystoseira tamariscifolia (Huds.) Papenf.","3197658","EXACT","100","ACCEPTED","SPECIES","Chromista","Ochrophyta","Phaeophyceae","Fucales","Sargassaceae","Cystoseira","Cystoseira tamariscifolia"
,"Dasya baillouviana (S.G.Gmelin) Montagne","Dasya baillouviana (S.G.Gmelin) Montagne","2659108","EXACT","100","ACCEPTED","SPECIES","Plantae","Rhodophyta","Florideophyceae","Ceramiales","Dasyaceae","Dasya","Dasya baillouviana"
,"Dasya corymbifera J.Agardh","Dasya corymbifera J.Agardh","2659195","EXACT","100","ACCEPTED","SPECIES","Plantae","Rhodophyta","Florideophyceae","Ceramiales","Dasyaceae","Dasya","Dasya corymbifera"
,"Dasya hutchinsiae Harvey","Dasya hutchinsiae Harv.","2659162","EXACT","100","ACCEPTED","SPECIES","Plantae","Rhodophyta","Florideophyceae","Ceramiales","Dasyaceae","Dasya","Dasya hutchinsiae"
,"Dasya rigidula (Kützing) Ardissone","Dasya rigidula (Kütz.) Ardiss.","2659157","EXACT","100","ACCEPTED","SPECIES","Plantae","Rhodophyta","Florideophyceae","Ceramiales","Dasyaceae","Dasya","Dasya rigidula"
,"Dermocorynus dichotomus (J.Agardh) Gargiulo","Dermocorynus dichotomus (J.Agardh) Gargiulo, M.Morabito & Manghisi, 2013","8195465","EXACT","99","DOUBTFUL","SPECIES","Plantae","Rhodophyta","Florideophyceae","Halymeniales","Halymeniaceae","Grateloupia","Dermocorynus dichotomus"
,"Dictyopteris polypodioides (A.P.De Candolle) J.V.Lamouroux","Dictyopteris polypodioides (DC.) J.V.Lamour.","5423614","EXACT","100","ACCEPTED","SPECIES","Chromista","Ochrophyta","Phaeophyceae","Dictyotales","Dictyotaceae","Dictyopteris","Dictyopteris polypodioides"
,"Dictyota bartayresiana J.V.Lamouroux","Dictyota bartayresiana J.V.Lamour.","5423551","EXACT","100","ACCEPTED","SPECIES","Chromista","Ochrophyta","Phaeophyceae","Dictyotales","Dictyotaceae","Dictyota","Dictyota bartayresiana"
,"Dictyota ciliolata Sonder ex Kützing","Dictyota ciliolata O.G.Sond. ex Kütz.","5423446","EXACT","100","ACCEPTED","SPECIES","Chromista","Ochrophyta","Phaeophyceae","Dictyotales","Dictyotaceae","Dictyota","Dictyota ciliolata"
,"Dictyota dichotoma (Hudson) J.V.Lamouroux","Dictyota dichotoma (Huds.) J.V.Lamour.","5423480","EXACT","100","ACCEPTED","SPECIES","Chromista","Ochrophyta","Phaeophyceae","Dictyotales","Dictyotaceae","Dictyota","Dictyota dichotoma"
,"Dictyota dichotoma var. intricata (C.Agardh) Greville","Dictyota dichotoma var. intricata (C.Agardh) Grev., 1830","5423488","EXACT","100","ACCEPTED","VARIETY","Chromista","Ochrophyta","Phaeophyceae","Dictyotales","Dictyotaceae","Dictyota","Dictyota dichotoma"
,"Dictyota implexa (Desfontaines) J.V.Lamouroux","Dictyota implexa (Desf.) J.V.Lamour.","5423476","EXACT","100","ACCEPTED","SPECIES","Chromista","Ochrophyta","Phaeophyceae","Dictyotales","Dictyotaceae","Dictyota","Dictyota implexa"
,"Dudresnaya verticillata (Withering) Le Jolis","Dudresnaya verticillata (Withering) Le Jolis","5279318","EXACT","100","ACCEPTED","SPECIES","Plantae","Rhodophyta","Florideophyceae","Gigartinales","Dumontiaceae","Dudresnaya","Dudresnaya verticillata"
,"Ellisolandia elongata (J.Ellis & Solander) K.R.Hind & G.W.Saunders","Ellisolandia elongata (J.Ellis & Sol.) K.R.Hind & G.W.Saunders","8103861","EXACT","100","ACCEPTED","SPECIES","Plantae","Rhodophyta","Florideophyceae","Corallinales","Corallinaceae","Ellisolandia","Ellisolandia elongata"
,"Erythrocystis montagnei (Derbès & Solier) P.C.Silva","Erythrocystis montagnei (Derbès & Solier) P.C.Silva, 1952","2660013","EXACT","100","ACCEPTED","SPECIES","Plantae","Rhodophyta","Florideophyceae","Ceramiales","Rhodomelaceae","Erythrocystis","Erythrocystis montagnei"
,"Feldmannia globifera (Kützing) Hamel","Feldmannia globifera (Kütz.) Hamel","5423260","EXACT","100","ACCEPTED","SPECIES","Chromista","Ochrophyta","Phaeophyceae","Ectocarpales","Acinetosporaceae","Feldmannia","Feldmannia globifera"
,"Feldmannophycus rayssiae (Feldmann & G.Feldmann) H.Augier & Boudouresque","Feldmannophycus rayssiae (Feldmann & G.Feldmann) H.Augier & Boudouresque, 1971","2666550","EXACT","100","ACCEPTED","SPECIES","Plantae","Rhodophyta","Florideophyceae","Gigartinales","Caulacanthaceae","Feldmannophycus","Feldmannophycus rayssiae"
,"Fucus spiralis Linnaeus","Fucus spiralis L.","3196369","EXACT","100","ACCEPTED","SPECIES","Chromista","Ochrophyta","Phaeophyceae","Fucales","Fucaceae","Fucus","Fucus spiralis"
,"Gaillona hookeri (Dillwyn) Athanasiadis","Gaillona Bonnemaison, 1828","4890364","HIGHERRANK","94","DOUBTFUL","GENUS","Plantae","Rhodophyta","Florideophyceae","Ceramiales","Callithamniaceae","Gaillona",
,"Gelidium corneum (Hudson) J.V.Lamouroux","Gelidium corneum (Huds.) J.V.Lamour.","2662882","EXACT","100","SYNONYM","SPECIES","Plantae","Rhodophyta","Florideophyceae","Gelidiales","Gelidiaceae","Gelidium","Gelidium spinosum"
,"Gelidium microdon Kützing","Gelidium J.V.Lamour.","9460134","HIGHERRANK","96","ACCEPTED","GENUS","Plantae","Rhodophyta","Florideophyceae","Gelidiales","Gelidiaceae","Gelidium",
,"Gelidium pusillum (Stackhouse) Le Jolis","Gelidium pusillum (Stackh.) Le Jol.","2662756","EXACT","100","ACCEPTED","SPECIES","Plantae","Rhodophyta","Florideophyceae","Gelidiales","Gelidiaceae","Gelidium","Gelidium pusillum"
,"Gelidium spinosum (S.G.Gmelin) P.C.Silva","Gelidium spinosum (S.G.Gmelin) P.C.Silva","2662738","EXACT","100","ACCEPTED","SPECIES","Plantae","Rhodophyta","Florideophyceae","Gelidiales","Gelidiaceae","Gelidium","Gelidium spinosum"
,"Gigartina pistillata (S.G.Gmelin) Stackhouse","Gigartina pistillata (S.G.Gmel.) Stackh.","2666168","EXACT","100","ACCEPTED","SPECIES","Plantae","Rhodophyta","Florideophyceae","Gigartinales","Gigartinaceae","Gigartina","Gigartina pistillata"
,"Gracilariopsis longissima (S.G.Gmelin) Steentoft","Gracilariopsis longissima (S.G.Gmelin) M.Steentoft, L.M.Irvine & W.F.Farnham","2665870","EXACT","100","SYNONYM","SPECIES","Plantae","Rhodophyta","Florideophyceae","Gracilariales","Gracilariaceae","Gracilaria","Gracilaria longissima"
,"Grateloupia filicina (J.V.Lamouroux) C.Agardh","Grateloupia filicina (J.V.Lamour.) C.Agardh","5729905","EXACT","100","ACCEPTED","SPECIES","Plantae","Rhodophyta","Florideophyceae","Halymeniales","Halymeniaceae","Grateloupia","Grateloupia filicina"
,"Griffithsia corallinoides (Linnaeus) Trevisan","Griffithsia corallinoides (Linnaeus) Trevisan","2657564","EXACT","100","ACCEPTED","SPECIES","Plantae","Rhodophyta","Florideophyceae","Ceramiales","Wrangeliaceae","Griffithsia","Griffithsia corallinoides"
,"Gymnogongrus crenulatus (Turner) J.Agardh","Gymnogongrus crenulatus (Turner) J.Agardh, 1851","2667130","EXACT","100","ACCEPTED","SPECIES","Plantae","Rhodophyta","Florideophyceae","Gigartinales","Phyllophoraceae","Gymnogongrus","Gymnogongrus crenulatus"
,"Gymnogongrus griffithsiae (Turner) C.Martius","Gymnogongrus griffithsiae (Turner) Mart.","2667139","EXACT","100","ACCEPTED","SPECIES","Plantae","Rhodophyta","Florideophyceae","Gigartinales","Phyllophoraceae","Gymnogongrus","Gymnogongrus griffithsiae"
,"Halarachnion ligulatum (Woodward) Kützing","Halarachnion ligulatum (Woodward) Kützing","2666936","EXACT","100","ACCEPTED","SPECIES","Plantae","Rhodophyta","Florideophyceae","Gigartinales","Furcellariaceae","Halarachnion","Halarachnion ligulatum"
,"Halopteris filicina (Grateloup) Kützing","Halopteris filicina (Gratel.) Kütz.","5423671","EXACT","100","ACCEPTED","SPECIES","Chromista","Ochrophyta","Phaeophyceae","Sphacelariales","Stypocaulaceae","Halopteris","Halopteris filicina"
,"Halopteris scoparia (Linnaeus) Sauvageau","Halopteris scoparia (L.) Sauv.","5423685","EXACT","100","ACCEPTED","SPECIES","Chromista","Ochrophyta","Phaeophyceae","Sphacelariales","Stypocaulaceae","Halopteris","Halopteris scoparia"
,"Halurus equisetifolius (Lightfoot) Kützing","Halurus equisetifolius (Lightf.) Kütz.","2658778","EXACT","100","ACCEPTED","SPECIES","Plantae","Rhodophyta","Florideophyceae","Ceramiales","Wrangeliaceae","Halurus","Halurus equisetifolius"
,"Halurus flosculosus (J.Ellis) Maggs & Hommersand","Halurus flosculosus (J.Ellis) Maggs & Hommers.","2658766","EXACT","100","ACCEPTED","SPECIES","Plantae","Rhodophyta","Florideophyceae","Ceramiales","Wrangeliaceae","Halurus","Halurus flosculosus"
,"Herposiphonia secunda (C.Agardh) Ambronn","Herposiphonia secunda (C.Agardh) Ambronn","2659338","EXACT","100","ACCEPTED","SPECIES","Plantae","Rhodophyta","Florideophyceae","Ceramiales","Rhodomelaceae","Herposiphonia","Herposiphonia secunda"
,"Herposiphonia secunda f. tenella (C.Agardh) M.J.Wynne","Herposiphonia secunda f. tenella (C.Agardh) M.J.Wynne, 1985","2659342","EXACT","100","SYNONYM","FORM","Plantae","Rhodophyta","Florideophyceae","Ceramiales","Rhodomelaceae","Herposiphonia","Herposiphonia tenella"
,"Hydroclathrus tilesii (Endlicher) Santiañez & M.J.Wynne","Hydroclathrus Bory de Saint-Vincent, 1825","3198483","HIGHERRANK","95","ACCEPTED","GENUS","Chromista","Ochrophyta","Phaeophyceae","Scytosiphonales","Scytosiphonaceae","Hydroclathrus",
,"Hydroclathrus clathratus (C.Agardh) M.Howe","Hydroclathrus clathratus (C.Agardh) M.Howe","3198487","EXACT","100","ACCEPTED","SPECIES","Chromista","Ochrophyta","Phaeophyceae","Scytosiphonales","Scytosiphonaceae","Hydroclathrus","Hydroclathrus clathratus"
,"Hypnea musciformis (Wulfen) J.V.Lamouroux","Hypnea musciformis","9802728","EXACT","99","ACCEPTED","SPECIES","Plantae","Rhodophyta","Florideophyceae","Gigartinales","Cystocloniaceae","Hypnea","Hypnea musciformis"
,"Hypoglossum hypoglossoides (Stackhouse) F.S.Collins & Hervey","Hypoglossum hypoglossoides (Stackhouse) F.S.Collins & Hervey","2661577","EXACT","100","ACCEPTED","SPECIES","Plantae","Rhodophyta","Florideophyceae","Ceramiales","Delesseriaceae","Hypoglossum","Hypoglossum hypoglossoides"
,"Itonoa marginifera (J.Agardh) Masuda & Guiry","Itonoa marginifera (J.Agardh) Masuda & Guiry, 1995","2667430","EXACT","100","ACCEPTED","SPECIES","Plantae","Rhodophyta","Florideophyceae","Nemastomatales","Nemastomataceae","Itonoa","Itonoa marginifera"
,"Jania capillacea Harvey","Jania capillacea Harv.","5276161","EXACT","100","ACCEPTED","SPECIES","Plantae","Rhodophyta","Florideophyceae","Corallinales","Corallinaceae","Jania","Jania capillacea"
,"Jania longifurca Zanardini","Jania longifurca Zanardini, 1844","5276157","EXACT","100","ACCEPTED","SPECIES","Plantae","Rhodophyta","Florideophyceae","Corallinales","Corallinaceae","Jania","Jania longifurca"
,"Jania pedunculata var. adhaerens (J.V.Lamouroux) A.S.Harvey","Jania pedunculata J.V.Lamour.","5276186","HIGHERRANK","96","ACCEPTED","SPECIES","Plantae","Rhodophyta","Florideophyceae","Corallinales","Corallinaceae","Jania","Jania pedunculata"
,"Jania rubens (Linnaeus) J.V.Lamouroux","Jania rubens (Linnaeus) J.V.Lamouroux","5276203","EXACT","100","ACCEPTED","SPECIES","Plantae","Rhodophyta","Florideophyceae","Corallinales","Corallinaceae","Jania","Jania rubens"
,"Jania virgata (Zanardini) Montagne","Jania virgata (Zanardini) Mont., 1846","5276147","EXACT","100","ACCEPTED","SPECIES","Plantae","Rhodophyta","Florideophyceae","Corallinales","Corallinaceae","Jania","Jania virgata"
,"Laurencia obtusa (Hudson) J.V.Lamouroux","Laurencia obtusa (Huds.) J.V.Lamour.","2661137","EXACT","100","SYNONYM","SPECIES","Plantae","Rhodophyta","Florideophyceae","Ceramiales","Rhodomelaceae","Laurencia","Laurencia dendroidea"
,"Laurencia pyramidalis Bory ex Kützing","Laurencia pyramidalis Bory ex Kütz., 1849","8178600","EXACT","100","ACCEPTED","SPECIES","Plantae","Rhodophyta","Florideophyceae","Ceramiales","Rhodomelaceae","Laurencia","Laurencia pyramidalis"
,"Laurencia tenera C.K.Tseng","Laurencia tenera C.K.Tseng, 1943","2661100","EXACT","100","ACCEPTED","SPECIES","Plantae","Rhodophyta","Florideophyceae","Ceramiales","Rhodomelaceae","Laurencia","Laurencia tenera"
,"Laurencia viridis Gil-Rodriguez & Haroun","Laurencia viridis","2660968","EXACT","99","ACCEPTED","SPECIES","Plantae","Rhodophyta","Florideophyceae","Ceramiales","Rhodomelaceae","Laurencia","Laurencia viridis"
,"Leathesia marina (Lyngbye) Decaisne","Leathesia marina (Lyngb.) Decne.","7627628","EXACT","100","ACCEPTED","SPECIES","Chromista","Ochrophyta","Phaeophyceae","Ectocarpales","Chordariaceae","Leathesia","Leathesia marina"
,"Leptosiphonia brodiei (Dillwyn) A.M.Savoie & G.W.Saunders","Leptosiphonia Kylin, 1956","2660186","HIGHERRANK","96","ACCEPTED","GENUS","Plantae","Rhodophyta","Florideophyceae","Ceramiales","Rhodomelaceae","Leptosiphonia",
,"Liagora distenta (Mertens ex Roth) J.V.Lamouroux","Liagora distenta (Mertens ex Roth) J.V.Lamour., 1816","5278699","EXACT","100","ACCEPTED","SPECIES","Plantae","Rhodophyta","Florideophyceae","Nemaliales","Liagoraceae","Liagora","Liagora distenta"
,"Liagora viscida (Forsskål) C.A.Agardh","Liagora viscida (Forsskal) C.A.Agardh","5278729","EXACT","100","ACCEPTED","SPECIES","Plantae","Rhodophyta","Florideophyceae","Nemaliales","Liagoraceae","Liagora","Liagora viscida"
,"Lobophora variegata (J.V.Lamouroux) Womersley ex E.C.Oliveira","Lobophora variegata (J.V.Lamour.) Womersley ex E.C.Oliveira","3200482","EXACT","100","ACCEPTED","SPECIES","Chromista","Ochrophyta","Phaeophyceae","Dictyotales","Dictyotaceae","Lobophora","Lobophora variegata"
,"Lophosiphonia cristata Falkenberg","Lophosiphonia cristata Falkenb.","2660336","EXACT","100","ACCEPTED","SPECIES","Plantae","Rhodophyta","Florideophyceae","Ceramiales","Rhodomelaceae","Lophosiphonia","Lophosiphonia cristata"
,"Lychaete pellucida (Hudson) M.J.Wynne","Lychaete J.Agardh, 1846","2644499","HIGHERRANK","94","DOUBTFUL","GENUS","Plantae","Chlorophyta","Ulvophyceae","Cladophorales","Cladophoraceae","Lychaete",
,"Melanothamnus harveyi (Bailey) Díaz-Tapia & Maggs","Melanothamnus harveyi (Bailey) Díaz-Tapia & Maggs","9738520","EXACT","100","ACCEPTED","SPECIES","Plantae","Rhodophyta","Florideophyceae","Ceramiales","Rhodomelaceae","Melanothamnus","Melanothamnus harveyi"
,"Meredithia microphylla (J.Agardh) J.Agardh","Meredithia microphylla (J.G.Arardh) J.G.Agardh","5279253","EXACT","100","ACCEPTED","SPECIES","Plantae","Rhodophyta","Florideophyceae","Gigartinales","Kallymeniaceae","Meredithia","Meredithia microphylla"
,"Mesogloia vermiculata (Smith) S.F.Gray","Mesogloia vermiculata (Sm.) Gray","3198634","EXACT","100","ACCEPTED","SPECIES","Chromista","Ochrophyta","Phaeophyceae","Ectocarpales","Chordariaceae","Mesogloia","Mesogloia vermiculata"
,"Microdictyon umbilicatum (Velley) Zanardini","Microdictyon umbilicatum (Velley) Zanardini","5272975","EXACT","100","ACCEPTED","SPECIES","Plantae","Chlorophyta","Ulvophyceae","Cladophorales","Anadyomenaceae","Microdictyon","Microdictyon umbilicatum"
,"Millerella tinerfensis (Seoane-Camba) S.M.Boo & J.M.Rico","Millerella G.H.Boo & S.M.Boo, 2016","10092748","HIGHERRANK","96","ACCEPTED","GENUS","Plantae","Rhodophyta","Florideophyceae","Gelidiales","Gelidiellaceae","Millerella",
,"Myrionema strangulans Greville","Myrionema strangulans Grev.","5423151","EXACT","100","ACCEPTED","SPECIES","Chromista","Ochrophyta","Phaeophyceae","Ectocarpales","Chordariaceae","Myrionema","Myrionema strangulans"
,"Nemalion elminthoides (Velley) Batters","Nemalion elminthoides (Velley) Batters","7658841","EXACT","100","SYNONYM","SPECIES","Plantae","Rhodophyta","Florideophyceae","Nemaliales","Liagoraceae","Nemalion","Nemalion multifidum"
,"Nemoderma tingitanum Schousboe ex Bornet","Nemoderma tingitanum Schousboe ex Bornet, 1892","3199676","EXACT","100","ACCEPTED","SPECIES","Chromista","Ochrophyta","Phaeophyceae","Nemodermatales","Nemodermataceae","Nemoderma","Nemoderma tingitanum"
,"Nitophyllum punctatum (Stackhouse) Greville","Nitophyllum punctatum (Stackh.) Grev.","2662113","EXACT","100","ACCEPTED","SPECIES","Plantae","Rhodophyta","Florideophyceae","Ceramiales","Delesseriaceae","Nitophyllum","Nitophyllum punctatum"
,"Osmundea pinnatifida (Hudson) Stackhouse","Osmundea pinnatifida (Huds.) Stackh.","2659421","EXACT","100","SYNONYM","SPECIES","Plantae","Rhodophyta","Florideophyceae","Ceramiales","Rhodomelaceae","Osmundea","Osmundea ramosissima"
,"Osmundea truncata (Kützing) K.W.Nam & Maggs","Osmundea truncata (Kützing) K.W.Nam & Maggs","2659435","EXACT","100","ACCEPTED","SPECIES","Plantae","Rhodophyta","Florideophyceae","Ceramiales","Rhodomelaceae","Osmundea","Osmundea truncata"
,"Padina pavonica (Linnaeus) Thivy","Padina pavonica (L.) Thivy","3200186","EXACT","100","ACCEPTED","SPECIES","Chromista","Ochrophyta","Phaeophyceae","Dictyotales","Dictyotaceae","Padina","Padina pavonica"
,"Papenfussiella kuromo (Yendo) Inagaki","Papenfussiella Kylin, 1940","3199329","HIGHERRANK","96","ACCEPTED","GENUS","Chromista","Ochrophyta","Phaeophyceae","Ectocarpales","Chordariaceae","Papenfussiella",
,"Peyssonnelia squamaria (S.G.Gmelin) Decaisne ex J.Agardh","Peyssonnelia squamaria (S.G.Gmelin) Decaisne","2667893","EXACT","92","ACCEPTED","SPECIES","Plantae","Rhodophyta","Florideophyceae","Peyssonneliales","Peyssonneliaceae","Peyssonnelia","Peyssonnelia squamaria"
,"Phyllophora crispa (Hudson) P.S.Dixon","Phyllophora crispa (Hudson) P.S.Dixon","5279442","EXACT","100","ACCEPTED","SPECIES","Plantae","Rhodophyta","Florideophyceae","Gigartinales","Phyllophoraceae","Phyllophora","Phyllophora crispa"
,"Platoma cyclocolpum (Montagne) F.Schmitz","Platoma cyclocolpum (Mont.) F.Schmitz","4375846","EXACT","100","ACCEPTED","SPECIES","Plantae","Rhodophyta","Florideophyceae","Nemastomatales","Schizymeniaceae","Platoma","Platoma cyclocolpum"
,"Platysiphonia delicata (Clemente) Cremades","Platysiphonia delicata (Clemente) Cremades","2662532","EXACT","100","ACCEPTED","SPECIES","Plantae","Rhodophyta","Florideophyceae","Ceramiales","Sarcomeniaceae","Platysiphonia","Platysiphonia delicata"
,"Pleonosporium borreri (Smith) Nägeli","Pleonosporium borreri (J.E.Sm.) Nägeli","2658677","EXACT","100","ACCEPTED","SPECIES","Plantae","Rhodophyta","Florideophyceae","Ceramiales","Wrangeliaceae","Pleonosporium","Pleonosporium borreri"
,"Plocamium cartilagineum (Linnaeus) P.S.Dixon","Plocamium cartilagineum (Linnaeus) P.S.Dixon","5278595","EXACT","100","ACCEPTED","SPECIES","Plantae","Rhodophyta","Florideophyceae","Plocamiales","Plocamiaceae","Plocamium","Plocamium cartilagineum"
,"Polysiphonia atlantica Kapraun & J.N.Norris","Polysiphonia atlantica Kapraun & J.N.Norris","5277654","EXACT","100","ACCEPTED","SPECIES","Plantae","Rhodophyta","Florideophyceae","Ceramiales","Rhodomelaceae","Polysiphonia","Polysiphonia atlantica"
,"Polysiphonia breviarticulata (C.Agardh) Zanardini","Polysiphonia Greville, 1823","5277608","HIGHERRANK","96","ACCEPTED","GENUS","Plantae","Rhodophyta","Florideophyceae","Ceramiales","Rhodomelaceae","Polysiphonia",
,"Polysiphonia ceramiiformis P.L.Crouan & H.M.Crouan","Polysiphonia ceramiiformis P.L.Crouan & H.M.Crouan, 1867","8229269","EXACT","100","ACCEPTED","SPECIES","Plantae","Rhodophyta","Florideophyceae","Ceramiales","Rhodomelaceae","Polysiphonia","Polysiphonia ceramiiformis"
,"Polysiphonia havanensis Montagne","Polysiphonia havanensis Mont.","5277633","EXACT","100","ACCEPTED","SPECIES","Plantae","Rhodophyta","Florideophyceae","Ceramiales","Rhodomelaceae","Polysiphonia","Polysiphonia havanensis"
,"Predaea feldmannii Børgesen","Predaea feldmannii Børgesen","2667440","EXACT","100","ACCEPTED","SPECIES","Plantae","Rhodophyta","Florideophyceae","Nemastomatales","Nemastomataceae","Predaea","Predaea feldmannii"
,"Pseudorhizoclonium africanum (Kützing) Boedeker","Pseudorhizoclonium africanum (Kütz.) Boed., 2016","10269807","EXACT","100","SYNONYM","SPECIES","Plantae","Chlorophyta","Ulvophyceae","Cladophorales","Cladophoraceae","Rhizoclonium","Rhizoclonium africanum"
,"Pterocladiella capillacea (S.G.Gmelin) Santelices & Hommersand","Pterocladiella capillacea (S.G.Gmelin) Santel. & Hommers.","2662919","EXACT","100","ACCEPTED","SPECIES","Plantae","Rhodophyta","Florideophyceae","Gelidiales","Pterocladiaceae","Pterocladiella","Pterocladiella capillacea"
,"Ralfsia verrucosa (Areschoug) Areschoug","Ralfsia verrucosa (Aresch.) Aresch.","5423236","EXACT","100","ACCEPTED","SPECIES","Chromista","Ochrophyta","Bacillariophyceae",,,"Ralfsia","Ralfsia verrucosa"
,"Rhodymenia holmesii Ardissone","Rhodymenia holmesii Ardiss.","2663356","EXACT","100","ACCEPTED","SPECIES","Plantae","Rhodophyta","Florideophyceae","Rhodymeniales","Rhodymeniaceae","Rhodymenia","Rhodymenia holmesii"
,"Sargassum cymosum C.Agardh","Sargassum cymosum C.Agardh","3196902","EXACT","100","ACCEPTED","SPECIES","Chromista","Ochrophyta","Phaeophyceae","Fucales","Sargassaceae","Sargassum","Sargassum cymosum"
,"Sargassum desfontainesii (Turner) C.Agardh","Sargassum desfontainesii (Turner) C.Agardh","3197003","EXACT","100","ACCEPTED","SPECIES","Chromista","Ochrophyta","Phaeophyceae","Fucales","Sargassaceae","Sargassum","Sargassum desfontainesii"
,"Sargassum furcatum Kützing","Sargassum furcatum Kütz.","3197176","EXACT","100","ACCEPTED","SPECIES","Chromista","Ochrophyta","Phaeophyceae","Fucales","Sargassaceae","Sargassum","Sargassum furcatum"
,"Sargassum vulgare C.Agardh","Sargassum vulgare C.Agardh","3197125","EXACT","99","ACCEPTED","SPECIES","Chromista","Ochrophyta","Phaeophyceae","Fucales","Sargassaceae","Sargassum","Sargassum vulgare"
,"Scinaia acuta M.J.Wynne","Scinaia Bivona-Bernardi, 1822","2665139","HIGHERRANK","96","ACCEPTED","GENUS","Plantae","Rhodophyta","Florideophyceae","Nemaliales","Scinaiaceae","Scinaia",
,"Scinaia furcellata (Turner) J.Agardh","Scinaia furcellata (Turner) J.Agardh, 1851","2665154","EXACT","100","ACCEPTED","SPECIES","Plantae","Rhodophyta","Florideophyceae","Nemaliales","Scinaiaceae","Scinaia","Scinaia furcellata"
,"Scytosiphon lomentaria (Lyngbye) Link","Scytosiphon lomentaria (Lyngb.) Link","5422803","EXACT","100","ACCEPTED","SPECIES","Chromista","Ochrophyta","Phaeophyceae","Scytosiphonales","Scytosiphonaceae","Scytosiphon","Scytosiphon lomentaria"
,"Sphacelaria cirrosa (Roth) C.Agardh","Sphacelaria cirrosa (Roth) C.Agardh","3200617","EXACT","100","ACCEPTED","SPECIES","Chromista","Ochrophyta","Phaeophyceae","Sphacelariales","Sphacelariaceae","Sphacelaria","Sphacelaria cirrosa"
,"Sphacelaria plumula Zanardini","Sphacelaria plumula Zanardini","3200690","EXACT","100","ACCEPTED","SPECIES","Chromista","Ochrophyta","Phaeophyceae","Sphacelariales","Sphacelariaceae","Sphacelaria","Sphacelaria plumula"
,"Sphaerococcus coronopifolius Stackhouse","Sphaerococcus coronopifolius Stackhouse","5279276","EXACT","100","ACCEPTED","SPECIES","Plantae","Rhodophyta","Florideophyceae","Gigartinales","Sphaerococcaceae","Sphaerococcus","Sphaerococcus coronopifolius"
,"Sphaerotrichia divaricata (C.Agardh) Kylin","Sphaerotrichia divaricata (C.Agardh) Kylin","3199116","EXACT","100","ACCEPTED","SPECIES","Chromista","Ochrophyta","Phaeophyceae","Ectocarpales","Chordariaceae","Sphaerotrichia","Sphaerotrichia divaricata"
,"Sphondylothamnion multifidum (Hudson) Nägeli","Sphondylothamnion multifidum (Hudson) Nägeli","2658352","EXACT","100","ACCEPTED","SPECIES","Plantae","Rhodophyta","Florideophyceae","Ceramiales","Wrangeliaceae","Sphondylothamnion","Sphondylothamnion multifidum"
,"Sporochnus pedunculatus (Hudson) C.Agardh","Sporochnus pedunculatus (Huds.) C.Agardh","3196257","EXACT","100","ACCEPTED","SPECIES","Chromista","Ochrophyta","Phaeophyceae","Sporochnales","Sporochnaceae","Sporochnus","Sporochnus pedunculatus"
,"Spyridia filamentosa (Wulfen) Harvey","Spyridia filamentosa (Wulfen) Harv.","2657164","EXACT","100","ACCEPTED","SPECIES","Plantae","Rhodophyta","Florideophyceae","Ceramiales","Spyridiaceae","Spyridia","Spyridia filamentosa"
,"Stypopodium zonale (J.V.Lamouroux) Papenfuss","Stypopodium zonale (J.V.Lamour.) Papenf.","3200586","EXACT","100","ACCEPTED","SPECIES","Chromista","Ochrophyta","Phaeophyceae","Dictyotales","Dictyotaceae","Stypopodium","Stypopodium zonale"
,"Symphyocladia marchantioides (Harvey) Falkenberg","Symphyocladia marchantioides (Harvey) Falkenberg, 1897","2661325","EXACT","100","SYNONYM","SPECIES","Plantae","Rhodophyta","Florideophyceae","Ceramiales","Rhodomelaceae","Placophora","Placophora marchantioides"
,"Taenioma nanum (Kützing) Papenfuss","Taenioma nanum (Kütz.) Papenf.","5278204","EXACT","100","ACCEPTED","SPECIES","Plantae","Rhodophyta","Florideophyceae","Ceramiales","Delesseriaceae","Taenioma","Taenioma nanum"
,"Taonia atomaria (Woodward) J.Agardh","Taonia atomaria (Woodw.) J.Agardh","3200436","EXACT","100","ACCEPTED","SPECIES","Chromista","Ochrophyta","Phaeophyceae","Dictyotales","Dictyotaceae","Taonia","Taonia atomaria"
,"Treptacantha abies-marina (S.G.Gmelin) Kützing","Chromista","4","HIGHERRANK","99","ACCEPTED","KINGDOM","Chromista",,,,,,
,"Ulothrix flacca (Dillwyn) Thuret","Ulothrix flacca (Dillwyn) Thur.","2646293","EXACT","100","ACCEPTED","SPECIES","Plantae","Chlorophyta","Ulvophyceae","Ulotrichales","Ulotrichaceae","Ulothrix","Ulothrix flacca"
,"Ulva clathrata (Roth) C.Agardh","Ulva clathrata (Roth) C.Agardh","9402904","EXACT","100","ACCEPTED","SPECIES","Plantae","Chlorophyta","Ulvophyceae","Ulvales","Ulvaceae","Ulva","Ulva clathrata"
,"Ulva compressa Linnaeus","Ulva compressa L.","5273322","EXACT","100","ACCEPTED","SPECIES","Plantae","Chlorophyta","Ulvophyceae","Ulvales","Ulvaceae","Ulva","Ulva compressa"
,"Ulva intestinalis Linnaeus","Ulva intestinalis L.","5273394","EXACT","100","ACCEPTED","SPECIES","Plantae","Chlorophyta","Ulvophyceae","Ulvales","Ulvaceae","Ulva","Ulva intestinalis"
,"Ulva lactuca Linnaeus","Ulva lactuca L.","5273309","EXACT","100","ACCEPTED","SPECIES","Plantae","Chlorophyta","Ulvophyceae","Ulvales","Ulvaceae","Ulva","Ulva lactuca"
,"Ulva linza Linnaeus","Ulva linza L.","5273454","EXACT","100","ACCEPTED","SPECIES","Plantae","Chlorophyta","Ulvophyceae","Ulvales","Ulvaceae","Ulva","Ulva linza"
,"Ulva rigida C.Agardh","Ulva rigida C.Agardh","5273416","EXACT","100","ACCEPTED","SPECIES","Plantae","Chlorophyta","Ulvophyceae","Ulvales","Ulvaceae","Ulva","Ulva rigida"
,"Valonia macrophysa Kützing","Valonia macrophysa Kütz.","5273065","EXACT","100","ACCEPTED","SPECIES","Plantae","Chlorophyta","Ulvophyceae","Siphonocladales","Valoniaceae","Valonia","Valonia macrophysa"
,"Valonia utricularis (Roth) C.Agardh","Valonia utricularis (Roth) C.Agardh","5273060","EXACT","100","ACCEPTED","SPECIES","Plantae","Chlorophyta","Ulvophyceae","Siphonocladales","Valoniaceae","Valonia","Valonia utricularis"
,"Vertebrata foetidissima (Cocks ex Bornet) Díaz-Tapia & Maggs","Vertebrata S.F.Gray, 1821","2660342","HIGHERRANK","96","ACCEPTED","GENUS","Plantae","Rhodophyta","Florideophyceae","Ceramiales","Rhodomelaceae","Vertebrata",
,"Vertebrata fruticulosa (Wulfen) Kuntze","Vertebrata fruticulosa (Wulfen) Kuntze, 1891","7549632","EXACT","100","ACCEPTED","SPECIES","Plantae","Rhodophyta","Florideophyceae","Ceramiales","Rhodomelaceae","Vertebrata","Vertebrata fruticulosa"
,"Vertebrata fucoides (Hudson) Kuntze","Vertebrata fucoides (Huds.) Kuntze","8074783","EXACT","100","SYNONYM","SPECIES","Plantae","Rhodophyta","Florideophyceae","Ceramiales","Rhodomelaceae","Polysiphonia","Polysiphonia fucoides"
,"Xiphosiphonia pennata (C.Agardh) Savoie & G.W.Saunders","Xiphosiphonia pennata (C.Agardh) Savoie & G.W.Saunders, 2016","10497204","EXACT","100","SYNONYM","SPECIES","Plantae","Rhodophyta","Florideophyceae","Ceramiales","Rhodomelaceae","Pterosiphonia","Pterosiphonia pennata"
,"Zonaria tournefortii (J.V.Lamouroux) Montagne","Zonaria tournefortii (J.V.Lamour.) Mont.","7777828","EXACT","100","ACCEPTED","SPECIES","Chromista","Ochrophyta","Phaeophyceae","Dictyotales","Dictyotaceae","Zonaria","Zonaria tournefortii"
